# Practical, expert guidance in clinical anesthesia begins here...

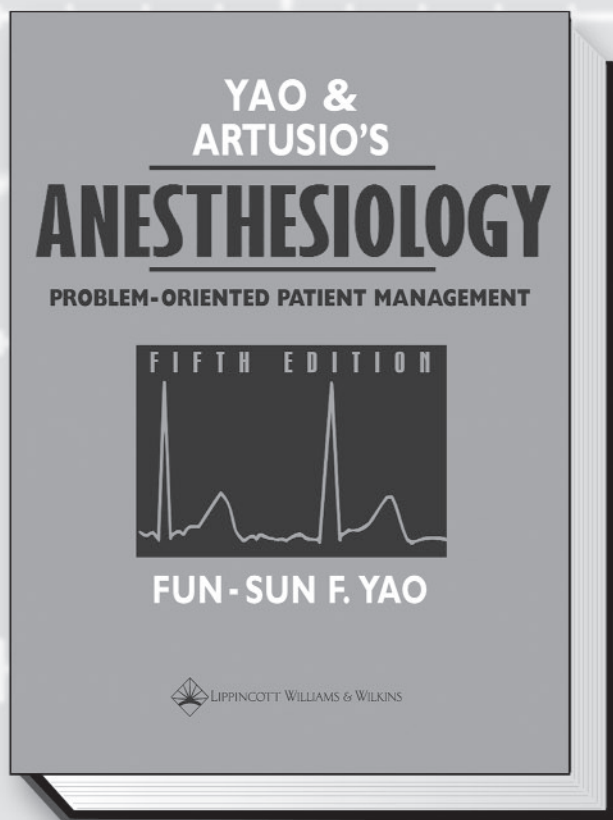

**Fun-Sun Yao, MD**

*Professor, Department of Anesthesiology  
Cornell University Medical Center  
New York, NY*

*2003 • 1,160 Pages • 105 Illus.  
Hardbound • ISBN: 0-7817-3641-2*

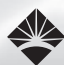

LIPPINCOTT WILLIAMS & WILKINS

Yao & Artusio's

## ANESTHESIOLOGY

PROBLEM-ORIENTED PATIENT  
MANAGEMENT, FIFTH EDITION

The only book in anesthesia that uses a case-based, problem-oriented approach, Yao's text is universally known as a teaching text for CRNAs and anesthesia residents. The book addresses approximately 60 common surgical procedures—each featuring a case; questions related to diagnosis, therapy, and surgery, including pre-, intra-, and postoperative management; and detailed explanations (with references, figures, and tables) for each question.

### *Look at all this knowledge-builder delivers...*

- **Complete coverage** guides you from pathophysiology and diagnosis, through preoperative evaluation and preparation, to intraoperative and postoperative management.
- **Unique problem-oriented approach** helps you tackle any challenge in clinical anesthesiology with confidence.
- **Detailed explanations and references** provide opportunities for further review.
- **Education-friendly format** makes this the perfect resource for exam preparation and self-assessment.

### **NEW TO THE FIFTH EDITION...**

- **New chapters** address Low Back Pain, Liver Transplantation, Awake Craniotomy, Ultrarapid Detoxification, and Implantable Cardioverter Defibrillators.
- **15 new contributing authors** provide a broader range of expert perspectives.

## ORDER YOUR COPY TODAY!

**CALL:** 1-800-638-3030 or 1-301-223-2300 (Outside the U.S. and Canada)

**FAX:** 1-301-223-2400 • **VISIT:** LWW.com

Or order from your local medical bookstore or publisher representative.
